# Supplementary material for: New insights into the evolution and functional divergence of the SWEET family in Saccharum based on comparative genomics
Source: PubMed Central journal article supplement (PMC6222987; doi:10.1186/s12870-018-1495-y), 2018-11-07

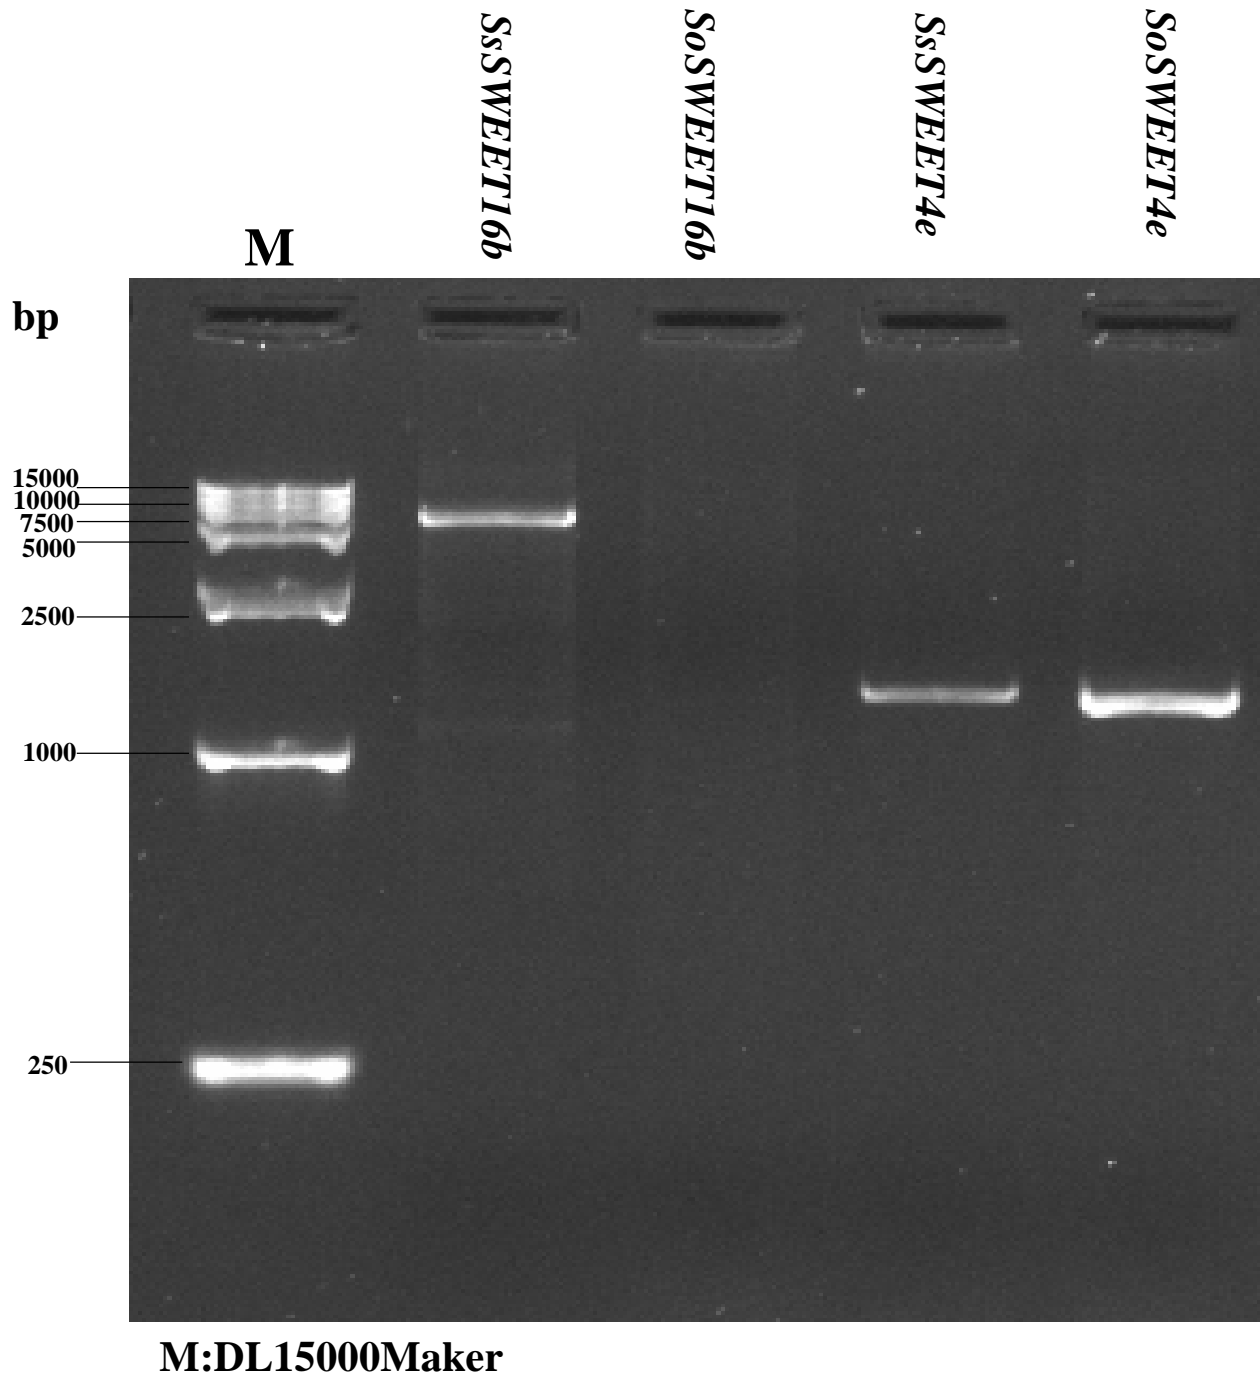

Supplement: 12870_2018_1495_MOESM6_ESM.pdf [file 12870_2018_1495_MOESM6_ESM.pdf]
