# Supplementary material for: New insights into the evolution and functional divergence of the SWEET family in Saccharum based on comparative genomics
Source: BMC Plant Biol. 2018 Nov 7;18:270. doi: 10.1186/s12870-018-1495-y (PMC6222987; doi:10.1186/s12870-018-1495-y)
Supplement: Supplementary file 1 — The SWEET gene alleles in S. spontaneum. (XLSX 12 kb) [file 12870_2018_1495_MOESM1_ESM.xlsx]

## Sheet: Sheet1
Additional File 1 The SWEET gene alleles in S. spontaneum.
		Allele A		Allele B		Allele C		Allele D
Sorghum homologs ID	Gene name (Bacterial artificial chromosome, BAC)	Gene ID	Chromosome position	Gene ID	Chromosome position	Gene ID	Chromosome position	Gene ID	Chromosome position
Sobic.003G377700	SsSWEET1a	Sspon.003A0002350	Chr3A:4797728-4800767			Sspon.003C0008280	Chr3C:16310194-16313446
Sobic.009G143500	SsSWEET1b	Sspon.007A0009940	Chr7A:20321930-20324623	Sspon.007B0008830	Chr7B:17967900-17970758
Sobic.003G182800	SsSWEET2a	Sspon.003A0016892	Chr3A:39057315-39059899	Sspon.003B0021171	Chr3B:51245351-51248207	Sspon.003C0024860	Chr3C:55635386-55636123
Sobic.003G269300	SsSWEET2b	Sspon.003A0009930	Chr3A:22204945-22208163	Sspon.003B0013630	Chr3B:29250588-29254601	Sspon.003C0017520	Chr3C:36847192-36849716	Sspon.003D0012610	Chr3D:27477594-27480078
Sobic.009G080900	SsSWEET3a			Sspon.007B0014271	Chr7B:41127728-41129183	Sspon.007C0013020	Chr7C:41462131-41464144
Sobic.003G015200	SsSWEET3b	Sspon.003A0030361	Chr3A:73875652-73877071					Sspon.003D0026850	Chr3D:58370436-58371527
Sobic.004G136600	SsSWEET4a	Sspon.004A0015972	Chr4A:52401020-52405770	Sspon.004B0014320|Sspon.004B0014330	Chr4B:36083084-36086308|Chr4B:36141110-36144643	Sspon.004C0016510	Chr4C:46928850-46931861
Sobic.004G133500	SsSWEET4b					Sspon.004C0016890	Chr4C:52516666-52518553	Sspon.004D0017751	Chr4D:52379516-52384308
Sobic.004G133600	SsSWEET4c							Sspon.004D0017790	Chr4D:52401709-52402731
Sobic.003G038700	SsSWEET4d	Sspon.003A0028060	Chr3A:68526887-68527884
Sobic.003G038800	N/A
Sobic.009G252000	SsSWEET5	Sspon.007A0000760	Chr7A:895221-896156	Sspon.007B0000461	Chr7B:972478-973426	Sspon.007C0000441	Chr7C:894261-895994	Sspon.007D0000390	Chr7D:880375-881177
Sobic.003G213000	SsSWEET6	Sspon.003A0014520	Chr3A:32099616-32101922	Sspon.003B0017701	Chr3B:39415669-39418351	Sspon.003C0022501	Chr3C:48260849-48263514	Sspon.003D0016740	Chr3D:36700676-36707418
Sobic.007G191200	SsSWEET11a					Sspon.006C0003370	Chr6C:3636653-3637585
Sobic.002G259301	SsSWEET11b			Sspon.002B0011860	Chr2B:27920829-27922224			Sspon.002D0010890	Chr2D:23607799-23609188
Sobic.001G373600	SsSWEET12	Sspon.001A0011572	Chr1A:27625871-27628055	Sspon.001B0015290	Chr1B:33972044-33974455
Sobic.008G094400	SsSWEET13a			Sspon.002B0033700	Chr2B:124875307-124875922
Sobic.008G094300	SsSWEET13b			Sspon.002B0033660	Chr2B:94875102-94876348
Sobic.008G094000	SsSWEET13c			Sspon.002B0033690	Chr2B:95084128-95086283	Sspon.002C0044291	Chr2C:124827131-124829696	Sspon.002D0039340	Chr2D:108842575-108846739
Sobic.005G123500	SsSWEET14	Sspon.006A0022791	Chr6A:91416087-91417283			Sspon.006C0024465	Chr6C:86573299-86574562	Sspon.006D0018171	Chr6D:58935106-58936379
Sobic.004G157100	SsSWEET15	Sspon.004A0014350	Chr4A:35625350-35628324	Sspon.004B0013430	Chr4B:31350179-31353279	Sspon.004C0014830	Chr4C:35201599-35209535	Sspon.004D0016150	Chr4D:38367050-38368123
Sobic.001G377600	SsSWEET16a	Sspon.001A0011210	Chr1A:26639959-26642948	Sspon.001B0014990	Chr1B:33321578-33324398			Sspon.001D0013080	Chr1D:29667732-29671058
Sobic.003G149000	SsSWEET16b			Sspon.003B0024323	Chr3B:72377713-72378725	Sspon.003C0027190	Chr3C:69157249-69162788
